# Supplementary material for: Gene Mutation Profiles in Primary Diffuse Large B Cell Lymphoma of Central Nervous System: Next Generation Sequencing Analyses
Source: Int J Mol Sci. 2016 May 6;17(5):683. doi: 10.3390/ijms17050683 (PMC4881509; doi:10.3390/ijms17050683)
Supplement: Supplementary file 1 [file ijms-17-00683-s001.xlsx]

## Sheet: Sheet1
Table S1. Recurrent mutations detected in 19 primary DLBCL CNS patients.
geneName	chromosome	location	Type of change	seq.REFCODON	seq.VARCODON	cDNA change	Protein change	dbSNP	COSMIC	Patients with mutation
APC	chr5	112175177	missense	GCA	ACA	c.3886G>A	p.A1296T			#7,#11
APC	chr5	112176008	missense	GAA	AAA	c.4717G>A	p.E1573K			#12,#16
ATM	chr11	108123588	missense	ACT	AGT	c.1847C>G	p.T616S	rs533129312		#8,#12
ATM	chr11	108170525	missense	ACC	ATC	c.5090C>T	p.T1697I			#8,#10
ATM	chr11	108181009	missense	GCA	GTA	c.5885C>T	p.A1962V			#8,#10
BRAF	chr7	140481458	nonsense	TGG	TGA	c.1349G>A	p.W450*		COSM253324	#7,#11
CDH1	chr16	68835744	missense	ACC	ATC	c.335C>T	p.T112I			#8,#19
CDH1	chr16	68835706	missense	TTG	TTC	c.297G>C	p.L99F			#10,#12
EGFR	chr7	55242485	missense	TCT	TTT	c.2255C>T	p.S752F	rs121913464	COSM4170219	#7,#16
EGFR-AS1	chr7	55249130	missense	GGC	AGC	c.2428G>A	p.G810S	rs121913230	COSM13192	#9,#16
ERBB2	chr17	37881432	missense	ACA	ATA	c.2624C>T	p.T875I			#6,#10
ERBB2	chr17	37881430	missense	GAG	GAC	c.2622G>C	p.E874D			#11,#12
FGFR2	chr10	123258075	missense	GAG	AAG	c.1596G>A	p.E536K			#6,#7,#14
FLT3	chr13	28592635	missense	ATG	ACG	c.2510T>C	p.M837T			#6,#9
GNAQ	chr9	80412458	missense	GAC	AAC	c.496G>A	p.D166N			#10,#11
HRAS	chr11	534282	missense	GTG	GAG	c.41T>A	p.V14E			#5,#10
JAK3	chr19	17945696	missense	GTC	ATC	c.2164G>A	p.V722I	rs3213409	COSM34213	#3,#12,#16
JAK3	chr19	17945710	frameshift	TGGGAA	TGAA	c.2148_2149delGG	p.WE717*			#7,#17
JAK3	chr19	17945776	missense	TGT	TAT	c.2084G>A	p.C695Y			#7,#19
JAK3	chr19	17945741	missense	GAC	AAC	c.2119G>A	p.D707N			#10,#12
KDR	chr4	55972974	missense	CAA	CAT	c.1718A>T	p.Q472H	rs1870377	COSM149673	#3,#4,#6,#8,#9,#10,#12,#14,#15
KDR	chr4	55953872	missense	GAG	GAT	c.3564G>T	p.E1188D			#6,#11
KDR	chr4	55961002	missense	GAG	AAG	c.2938G>A	p.E980K		COSM3730306	#7,#11
KIT	chr4	55593464	missense	ATG	CTG	c.1621A>C	p.M541L	rs3822214	COSM28026	#14,#16,#18
KRAS	chr12	25398282	missense	GGC	TGC	c.37G>T	p.G13C	rs121913535	COSM527	#7,#10
MET	chr7	116411990	missense	ACT	ATT	c.3029C>T	p.T1010I	rs56391007	COSM707	#12,#17
PTPN11	chr12	112888202	missense	ACT	ATT	c.218C>T	p.T73I	rs121918462	COSM13019	#7,#10
RB1	chr13	49027231	missense	CAC	TAC	c.1798C>T	p.H560Y			#8,#19
RET	chr10	43613908	missense	TAT	TTT	c.2372A>T	p.Y791F	rs77724903	COSM1159820	#12,#17
SMO	chr7	128846157	missense	CTC	TTC	c.1087C>T	p.L363F			#10,#16
STK11	chr19	1221279	missense	GGG	AGG	c.802G>A	p.G268R		COSM4559384	#12, #19
TP53	chr17	7579472	missense	CCC	CGC	c.417C>G	p.P72R	rs1042522	COSM250061	#1,#2,#3,#4,#5,#6,#10,#13,#14,#15,#16,#17,#18,#19
TP53	chr17	7579874	frameshift	CCT	CCT	c.38delC	p.P13X			#9,#11
